# Supplementary material for: Polyether Ionophore Antibiotics Target Drug-Resistant Clinical Isolates, Persister Cells, and Biofilms
Source: PubMed Central journal article supplement (PMC10433871; doi:10.1128/spectrum.00625-23), 2023-06-08
Supplement: spectrum.00625-23-s0001.pdf [file spectrum.00625-23-s0001.pdf]

## Supporting Information

### **Polyether ionophore antibiotics target drug-resistant clinical isolates, persister cells and biofilms**

Malene Wollesen<sup>1</sup>, Kasper Mikkelsen<sup>3</sup>, Marie Selch Tvillum<sup>2</sup>, Martin Vestergaard<sup>3</sup>, Mikala Wang<sup>4</sup>, Rikke L. Meyer<sup>5,6</sup>, Hanne Ingmer<sup>3</sup>, Thomas B. Poulsen<sup>1,\*</sup>, Thomas Tørring<sup>2,\*</sup>

<sup>1</sup> Department of Chemistry, Aarhus University, Langelandsgade 140, DK-8000, Aarhus C, Denmark.

<sup>2</sup> Department of Biological and Chemical Engineering, Gustav Wieds Vej 10, DK-8000, Aarhus C, Denmark.

<sup>3</sup> Department of Veterinary and Animal Sciences, University of Copenhagen, Denmark

<sup>4</sup> Department of Clinical Microbiology, Aarhus University Hospital, Palle Juul-Jensens Boulevard 99, DK-8200 Aarhus N, Denmark

<sup>5</sup> Interdisciplinary Nanoscience Center, Gustav Wieds Vej 14, DK-8000, Aarhus C, Denmark.

<sup>6</sup> Department of Biology, Ny Munkegade 114-116, DK-8000, Aarhus C, Denmark

\* e-mail: [thomast@bce.au.dk](mailto:thomast@bce.au.dk); [thpou@chem.au.dk](mailto:thpou@chem.au.dk)

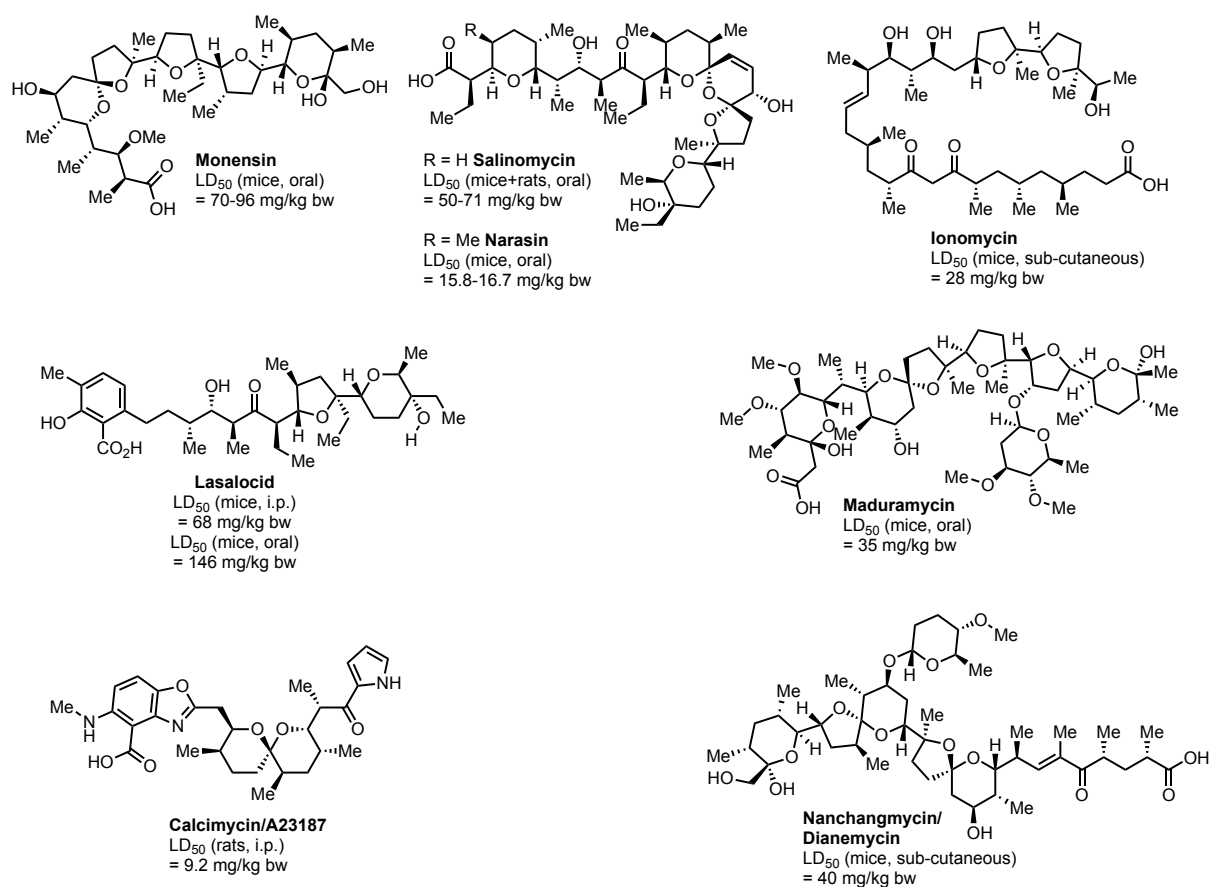

**Fig. S1.** Chemical structures of polyether ionophores used in this study and a compilation of selected, reported toxicity values (acute LD<sub>50</sub>) in mice or rats. Additional data can be found in the parent resources: Monensin<sup>1</sup>, salinomycin<sup>2</sup>, narasin<sup>3</sup>, Ionomycin<sup>4</sup>, lasalocid<sup>5</sup>, maduramycin<sup>6</sup>, calcimycin<sup>7</sup>, nanchangmycin<sup>8</sup>.

<sup>1</sup> [https://www.ema.europa.eu/en/documents/mrl-report/monensin-cattle-including-dairy-cows-summary-report-committee-veterinary-medicinal-products\\_en.pdf](https://www.ema.europa.eu/en/documents/mrl-report/monensin-cattle-including-dairy-cows-summary-report-committee-veterinary-medicinal-products_en.pdf) (accessed on 2/1-2023)

<sup>2</sup> <https://www.efsa.europa.eu/en/efsajournal/pub/76> (accessed on 2/1-2023)

<sup>3</sup> <https://www.efsa.europa.eu/en/efsajournal/pub/5460> (accessed on 2/1-2023)

<sup>4</sup> W.-C. Liu, *et al. J. Antibiot.* **1978**, *31*, 815-819.

<sup>5</sup> [https://www.ema.europa.eu/en/documents/mrl-report/lasalocid-sodium-summary-report-committee-veterinary-medicinal-products\\_en.pdf](https://www.ema.europa.eu/en/documents/mrl-report/lasalocid-sodium-summary-report-committee-veterinary-medicinal-products_en.pdf) (accessed on 2/1-2023)

<sup>6</sup> <https://www.efsa.europa.eu/en/efsajournal/pub/1952> (accessed on 2/1-2023)

<sup>7</sup> T. J. Sobotka, R. F. Brodie, Y. Quander, M. O'Donnell, G. L. West, *Neurotoxicol. Teratol.* **1987**, *9*, 99-106

<sup>8</sup> R. L. Hamill, M. M. Hoehn, G. E. Pittenger, J. Chamberlin, M. Gorman, *J. Antibiot.* **1969**, *22*, 161-164.

**Table S1.** Biofilm eradication results in the clinical isolates. A biofilm in each strain was first grown for 24 hours and then treated for another 24 hours. The biofilms were allowed to recover for 72 hours, and the minimum biofilm eradication concentrations (MBEC) were determined and listed below in µg/mL. The assay was performed in five methicillin-sensitive strains and three MRSA strains. Clinical isolates 1, 2 and 5 are penicillin-resistant and methicillin-sensitive whereas clinical isolates 3 and 4 are both penicillin- and methicillin-sensitive. Clinical isolates 6-8 are methicillin-resistant. Wildtype *S. aureus* DSM 20231, and wildtype *S. aureus* MRSA USA 300 je2 were included for comparison.

| Compound      | Methicillin-sensitive <i>S. aureus</i> |                    |                    |                    |                    |                    | Methicillin-resistant <i>S. aureus</i> |                    |                    |                    |
|---------------|----------------------------------------|--------------------|--------------------|--------------------|--------------------|--------------------|----------------------------------------|--------------------|--------------------|--------------------|
|               | <i>S. aureus</i> DSM 20231             | Clinical isolate 1 | Clinical isolate 2 | Clinical isolate 3 | Clinical isolate 4 | Clinical isolate 5 | <i>S. aureus</i> MRSA USA 300 je2      | Clinical isolate 6 | Clinical isolate 7 | Clinical isolate 8 |
| Lasalocid     | 64-128                                 | 128                | 128                | 128                | 128                | 128                | 128                                    | 128                | 128                | 128                |
| Salinomycin   | ≥1024                                  | >1024              | >1024              | >1024              | >1024              | >1024              | 1024                                   | 1024               | 1024               | 1024               |
| Monensin      | >128                                   | >128               | >128               | >128               | >128               | >128               | >128                                   | >128               | >128               | >128               |
| Calcimycin    | 4-8                                    | 16                 | 8                  | 16                 | 16                 | 4                  | 4                                      | 4                  | 8                  | 4                  |
| Ionomycin     | ≥1024                                  | >1024              | >1024              | >1024              | >1024              | >1024              | >1024                                  | >1024              | >1024              | >1024              |
| Narasin       | 256-512                                | 1024               | >1024              | >1024              | >1024              | 1024               | 256                                    | 256                | 256                | 256                |
| Maduramycin   | ≥1024                                  | >1024              | >1024              | >1024              | >1024              | >1024              | >1024                                  | >1024              | >1024              | >1024              |
| Nanchangmycin | 32                                     | 64                 | 64                 | 128                | 64                 | 64                 | 128                                    | 128                | 8                  | 8                  |
| Vancomycin    | 1024                                   | >1024              | 1024               | >1024              | >1024              | >1024              | >1024                                  | >1024              | >1024              | >1024              |

**Table S2.** List of genes with mutations found in nanchangmycin-resistant isolates. The sequencing data have been deposited to Genbank under Bioproject number PRJNA877072 and accession numbers: CP104478 (untreated reference), CP104477 (resistant mutant 1), CP104476 (resistant mutant 2), CP104475 (resistant mutant 3).

| Locus          | Name                               | Predicted function        |
|----------------|------------------------------------|---------------------------|
| WP_000021864.1 | TrkH                               | Potassium uptake          |
| WP_001161085.1 | MspA                               | membrane stabilizing      |
| WP_000066900.1 | SarV                               | Transcriptional regulator |
| WP_000757569.1 | glycerophosphodiesterase           | Phosphodiester hydrolysis |
| WP_001151499.1 | ATP-dependent helicase recG        | DNA repair                |
| WP_001118443.1 | translation initiation factor IF-1 | Protein synthesis         |

**Table S3.** Hits of the Nebraska Transposon Mutant Library screen, with corresponding MIC values of the relative gene-inactivated mutants against Lasalocid (Las), Salinomycin (Sal), Calcimycin (Cal), and Nanchangmycin (Nan).

| <b>Locus</b>  | <b>Name</b> | <b>Product</b>                           | <b>Las</b> | <b>Sal</b> | <b>Cal</b> | <b>Nan</b> |
|---------------|-------------|------------------------------------------|------------|------------|------------|------------|
| MRSA wildtype |             |                                          | 4          | 2          | 0.0625     | 2          |
| SAUSA300_1357 | <i>aroC</i> | chorismate synthase                      | 0.25       | 0.125      | 0.0625     | 0.25       |
| SAUSA300_1615 | <i>hemB</i> | delta-aminolevulinic acid<br>dehydratase | 0.5        | 0.25       | 0.0625     | 0.25       |
| SAUSA300_0844 | <i>ndh2</i> | NADH:ubiquinone reductase                | 2          | 1          | 0.0625     | 1          |
| SAUSA300_0962 | <i>qoxB</i> | quinol oxidase, subunit I                | 2          | 1          | 0.0625     | 1          |
| SAUSA300_0961 | <i>qoxC</i> | quinol oxidase, subunit III              | 2          | 1          | 0.0625     | 1          |
| SAUSA300_0963 | <i>qoxA</i> | quinol oxidase, subunit II               | 2          | 1          | 0.0625     | 1          |
| SAUSA300_1016 | <i>cyoE</i> | protoheme IX farnesyltransferase         | 2          | 1          | 0.0625     | 1          |

**Table S4.** Multi locus sequence typing of clinical isolates and identified resistance genes. MLST marked with \* was not found in pubMLST so the closest match is listed. AUH3 and AUH4 appear to be identical even though they are isolated from different patients on difference dates.

| <b>Isolate ID</b> | <b>MLST</b> | <b>Resistance genes</b> |
|-------------------|-------------|-------------------------|
| AUH1              | ST30*       | BlaZ                    |
| AUH2              | ST72        | BlaZ                    |
| AUH3              | ST5/ST4166  |                         |
| AUH4              | ST5/ST4166  |                         |
| AUH5              | ST1*        | BlaZ                    |
| AUH6              | ST6         | MecA, BlaZ              |
| AUH7              | ST22/ST957  | MecA, BlaZ              |
| AUH8              | ST8/ST4803  | MecA, BlaZ              |

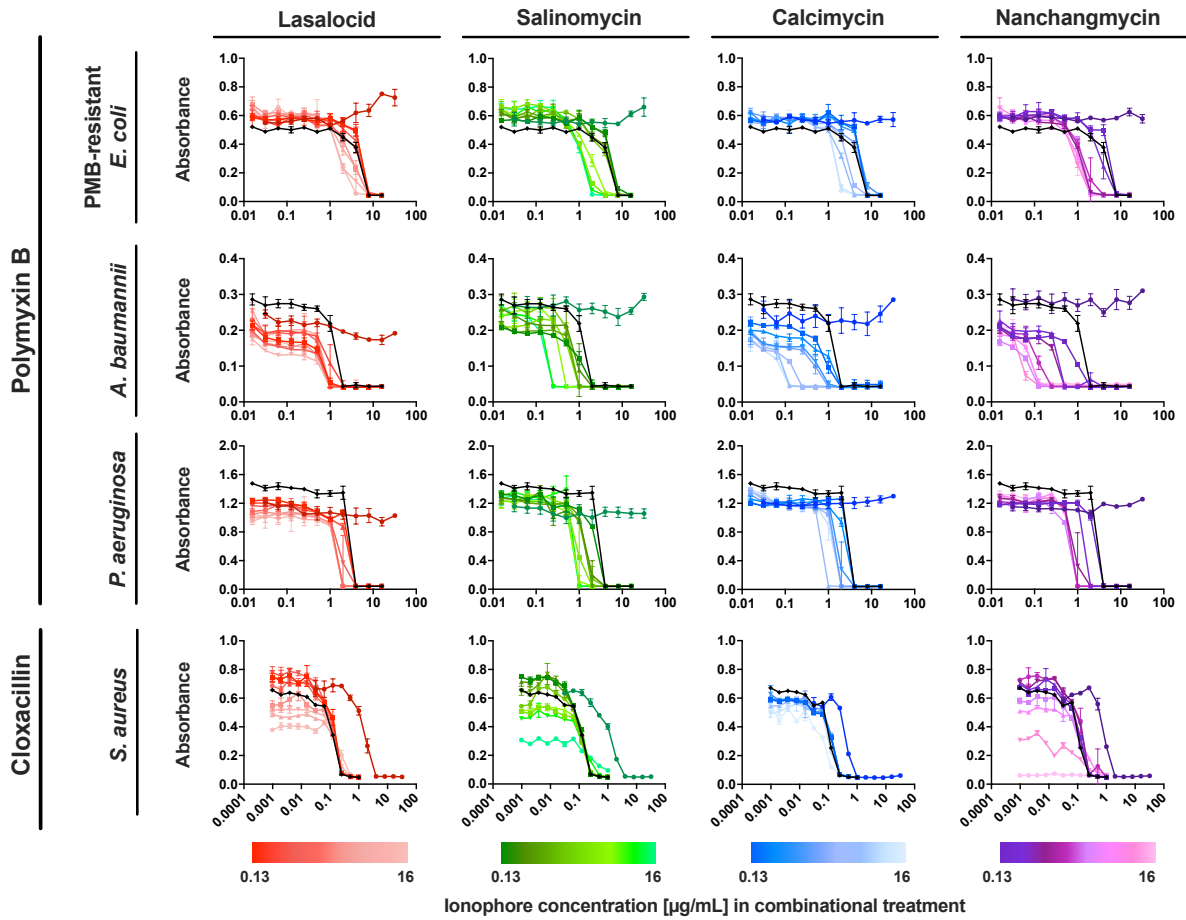

**Fig. S2.** Combinatorial treatment in a polymyxin-resistant *E. coli* (DH5 $\alpha$  pGDP2 MCR-1), *A. baumannii* DSM 300007, *P. aeruginosa* DSM 19880, and *S. aureus* DSM 20231. The three gram-negative strains were treated with polymyxin B, and *S. aureus* was treated with cloxacillin, all in combination with four selected ionophores which were added as a fixed dosage (concentration range 0.13-16  $\mu\text{g/mL}$  in gram-negative strains; 0.004-0.5xMIC in *S. aureus*). Polymyxin B, cloxacillin and the ionophores were tested as single treatments (PMB/cloxacillin: black; lasalocid: dark red circles; salinomycin: dark green circles; calcimycin: dark blue circles; nanchangmycin: dark purple circles) as positive and negative controls.
